# Supplementary material
Source: PubMed Central journal article supplement (PMC7172020)
Supplement: NIHMS1572102-supplement-315886_Major_Resources_Table.pdf [file NIHMS1572102-supplement-315886_Major_Resources_Table.pdf]

## Major Resources Table

In order to allow validation and replication of experiments, all essential research materials listed in the Methods should be included in the Major Resources Table below. Authors are encouraged to use public repositories for protocols, data, code, and other materials and provide persistent identifiers and/or links to repositories when available. Authors may add or delete rows as needed.

### Animals (*in vivo* studies)

| Species | Vendor or Source                                   | Background Strain | Sex  | Persistent ID / URL                                                               |
|---------|----------------------------------------------------|-------------------|------|-----------------------------------------------------------------------------------|
| mouse   | Jackson Laboratory<br>(Bar Harbor, Marine,<br>USA) | C57BL/6J          | male | <a href="https://www.jax.org/strain/000664">https://www.jax.org/strain/000664</a> |

### Genetically Modified Animals

|                        | Species                           | Vendor or Source                                                    | Background Strain | Other Information | Persistent ID / URL                                                                               |
|------------------------|-----------------------------------|---------------------------------------------------------------------|-------------------|-------------------|---------------------------------------------------------------------------------------------------|
| <b>Parent - Male</b>   | VE-Cadherin<br>Cre Tg             | Lab owned                                                           | C57BL/6J          |                   | <a href="https://doi.org/10.1002/dvdy.20643">https://doi.org/10.1002/dvdy.20643</a>               |
| <b>Parent - Female</b> | miR-15a/16-1 <sup>flox/flox</sup> | A generous gift from Dr. Riccardo Dall'Acqua at Columbia University | C57BL/6J          |                   | <a href="https://doi.org/10.1016/j.ccr.2009.11.019">https://doi.org/10.1016/j.ccr.2009.11.019</a> |

### Antibodies

| Target antigen     | Vendor or Source                       | Catalog # | Working concentration | Lot # (preferred but not required) | Persistent ID / URL                                                                                                                                                                                                                                                                                                                                                                                                                                                                       |
|--------------------|----------------------------------------|-----------|-----------------------|------------------------------------|-------------------------------------------------------------------------------------------------------------------------------------------------------------------------------------------------------------------------------------------------------------------------------------------------------------------------------------------------------------------------------------------------------------------------------------------------------------------------------------------|
| mouse CD31         | BD Pharmingen<br>(San Diego, CA, USA)  | 553370    | 1: 200                |                                    | <a href="https://wwwbdbiosciences.com/us/applications/research/stem-cell-research/cancer-research/mouse/purified-rat-anti-mouse-cd31-mec-133/p/553370">https://wwwbdbiosciences.com/us/applications/research/stem-cell-research/cancer-research/mouse/purified-rat-anti-mouse-cd31-mec-133/p/553370</a>                                                                                                                                                                                   |
| mouse MAP2         | EMD Millipore<br>(Burlington, MA, USA) | AB5622    | 1: 500                |                                    | <a href="https://www.emdmillipore.com/US/en/product/Anti-Microtubule-Associated-Protein-2-MAP2-Antibody,MM_NF-AB5622">https://www.emdmillipore.com/US/en/product/Anti-Microtubule-Associated-Protein-2-MAP2-Antibody,MM_NF-AB5622</a>                                                                                                                                                                                                                                                     |
| BrdU               | BD Pharmingen                          | 555627    | 1: 200                |                                    | <a href="https://wwwbdbiosciences.com/us/applications/research/clinical-research/oncology-research/proliferation-cell-cycle-and-cell-death/intracellular/cell-signalling-and-transcription-factors/human/purified-mouse-anti-brdu-3d4/p/555627">https://wwwbdbiosciences.com/us/applications/research/clinical-research/oncology-research/proliferation-cell-cycle-and-cell-death/intracellular/cell-signalling-and-transcription-factors/human/purified-mouse-anti-brdu-3d4/p/555627</a> |
| mouse VEGFA        | Abcam<br>(Cambridge, MA, USA)          | Ab51745   | 1: 500                |                                    | <a href="https://www.abcam.com/VEGFA-antibody-ab51745.html">https://www.abcam.com/VEGFA-antibody-ab51745.html</a>                                                                                                                                                                                                                                                                                                                                                                         |
| Mouse/human VEGFA  | Abcam                                  | Ab46154   | 1: 500                |                                    | <a href="https://www.abcam.com/vegfa-antibody-ab46154.html">https://www.abcam.com/vegfa-antibody-ab46154.html</a>                                                                                                                                                                                                                                                                                                                                                                         |
| mouse/human VEGFR2 | Cell Signaling<br>(Beverly,            | 2479L     | 1: 500                |                                    | <a href="https://www.cellsignal.com/products/primary-antibodies/vegfr2-receptor-2-55b11-rabbit-mab/2479">https://www.cellsignal.com/products/primary-antibodies/vegfr2-receptor-2-55b11-rabbit-mab/2479</a>                                                                                                                                                                                                                                                                               |

DOI [to be added]

|                          |                                              |                |         |  |                                                                                                                                                                                                           |
|--------------------------|----------------------------------------------|----------------|---------|--|-----------------------------------------------------------------------------------------------------------------------------------------------------------------------------------------------------------|
|                          | MA, USA)                                     |                |         |  |                                                                                                                                                                                                           |
| mouse/<br>human<br>FGF2  | Sigma-<br>Aldrich (St.<br>Louis, MO,<br>USA) | SAB210<br>8135 | 1: 800  |  | <a href="https://www.sigmaaldrich.com/catalog/product/sigma/sab2108135?lang=en&amp;region=US">https://www.sigmaaldrich.com/catalog/product/sigma/sab2108135?lang=en&amp;region=US</a>                     |
| mouse/<br>human<br>FGFR1 | Cell<br>Signaling                            | 9740S          | 1: 1000 |  | <a href="https://www.cellsignal.com/products/primary-antibodies/fgf-receptor-1-d8e4-xp-rabbit-mab/9740">https://www.cellsignal.com/products/primary-antibodies/fgf-receptor-1-d8e4-xp-rabbit-mab/9740</a> |
| β-actin                  | Sigma-<br>Aldrich                            | A5441          | 1: 2000 |  | <a href="https://www.sigmaaldrich.com/catalog/product/sigma/a5441?lang=en&amp;region=US">https://www.sigmaaldrich.com/catalog/product/sigma/a5441?lang=en&amp;region=US</a>                               |

### DNA/cDNA Clones

| Clone Name                                   | Sequence                                                                                                                                                                                                                                                                                                                                                                                                                                                                                                                                                                                                                                                                                                                                                                                                                                                                                                                                                                                                                                                                                                                                                                                                                                                                                                                                                                                                                                                                                                                                                                                                                                                                                                                                                                                                                                                                                                                                                                                               | Source / Repository | Persistent ID / URL                                                                                                                                                                                                                                                                                   |
|----------------------------------------------|--------------------------------------------------------------------------------------------------------------------------------------------------------------------------------------------------------------------------------------------------------------------------------------------------------------------------------------------------------------------------------------------------------------------------------------------------------------------------------------------------------------------------------------------------------------------------------------------------------------------------------------------------------------------------------------------------------------------------------------------------------------------------------------------------------------------------------------------------------------------------------------------------------------------------------------------------------------------------------------------------------------------------------------------------------------------------------------------------------------------------------------------------------------------------------------------------------------------------------------------------------------------------------------------------------------------------------------------------------------------------------------------------------------------------------------------------------------------------------------------------------------------------------------------------------------------------------------------------------------------------------------------------------------------------------------------------------------------------------------------------------------------------------------------------------------------------------------------------------------------------------------------------------------------------------------------------------------------------------------------------------|---------------------|-------------------------------------------------------------------------------------------------------------------------------------------------------------------------------------------------------------------------------------------------------------------------------------------------------|
| MmiT072613-MT01<br>(mVEGFA<br>3'UTR plasmid) | <p>&gt;MmiT072613-MT01 3'UTR</p> <p>gccaggctgcaggaaggagcctccctcagggttcgggaaccagacct<br/>ctcaccgaaaagaccgattaacctatgtcaccaccagccatcatcgtc<br/>accgttgacagaacagtccttaatccagaaagcctgacatgaaggaa<br/>gaggagactcttcgaggagcacttgggtccggaggcgagactccgg<br/>cagacgcattcccggcaggtgaccaagcacggctcctcgtgggactg<br/>gattcgccattttctatatctgtgctctaaatcgccaagcccgaagatt<br/>agggtgtttctgggattcctgtagacacacccacccacatacacat<br/>atatatatattatataataataatataatgtttatataaaat<br/>atatatattcttttttaattaactctgctaatgttattggtgcttact<br/>ggatatgttgactgctgtggactgtgtggaggaggatgtcctcact<br/>cggatgccgacacgggagacaatgggatgaaaggcttcagtgtggtct<br/>gagagaggccgaagtcctttgctgcccgggagcaagcaaggccag<br/>ggcacgggggacattggctcactccagaaacacgaaaaccattc<br/>ctggcctgagtcaagaggacagagagacagatgatgacagagaaa<br/>gagataaagatccgggtccaaccagaagtttggggagcctcaggac<br/>atgggatgctttgtggatcccatgatagtctcaaaaagcaccgccc<br/>ctctgggactgctggaagaatcgggagcctggccagcctcagctc<br/>gtcctcactctgaggggctaggaggcctcccacaggtgtcccggc<br/>aagagaagacacgggtggaagaagaggcctggtaatggcccctcc<br/>tctgggacccctctcctctccttaccacccctcctgggtacagccca<br/>ggaggactgtgtgatcagaccattgaaaccactaattctgtcccag<br/>gagactggctgtgtgtgtgagtggtaccctcctcatctccctccc<br/>aaggcacagagcaatggggcaggaccgcaagcccctcacggaggc<br/>agagaaaagagaaagtgtttatatacggctacttattaatagcccttt<br/>taattagaaattaaacagttaatttaataaagagtagggttttttca<br/>gtattctgggtaataatttaactattatgatgatctctcgtc<br/>ctctctattgtactgtgtgtgtgtgtgtgtgtgtgtgtgtgtgtgt<br/>gtgtgtgatgaaatctgtgtttccaatctctctcccagatcggtgaca<br/>gtcactagctgtcctgagaagatatttaatttgtaaacactcagctct<br/>gccctcctgtcccaccacacattccttgaataaggttcaatata<br/>cattacatactatataatattggcaactgtgtttgtatataaata<br/>tatatatatatatgtttatgtatatatgtgattctgataaaatagacat<br/>tgctattctgtttttatgtataaaacaaaacagaaaaatagagaat<br/>tctacatactaaatctctccttttttaatttaattttgtatcattatt<br/>tattggtgctactgtttatccgtaataattgtgggggaaaaagatatta<br/>catcacgtcttctctagagcagtttccgagatattccgtagtacata<br/>tttttttaaacagcaacaagaatacagatatcttaaaaaaa</p> | GeneCopoeia         | <a href="https://www.genecopoeia.com/product/search/detail.php?prt=16&amp;cid=&amp;key=MmiT072613&amp;type=mirna%20target&amp;choose=MmiT072613-MT01">https://www.genecopoeia.com/product/search/detail.php?prt=16&amp;cid=&amp;key=MmiT072613&amp;type=mirna%20target&amp;choose=MmiT072613-MT01</a> |

|                                          |                                                                                                                                                                                                                                                                                                                                                                                                                                                                                                                                                                                                                                                                                                                                                                                                                                                                                                                                                                                                                                                                                                                                                                                                                                                                                                                                                                                                                                                                                                                                                                                                                                                                                                                          |             |                                                                                                                                                                                                                                                                                                             |
|------------------------------------------|--------------------------------------------------------------------------------------------------------------------------------------------------------------------------------------------------------------------------------------------------------------------------------------------------------------------------------------------------------------------------------------------------------------------------------------------------------------------------------------------------------------------------------------------------------------------------------------------------------------------------------------------------------------------------------------------------------------------------------------------------------------------------------------------------------------------------------------------------------------------------------------------------------------------------------------------------------------------------------------------------------------------------------------------------------------------------------------------------------------------------------------------------------------------------------------------------------------------------------------------------------------------------------------------------------------------------------------------------------------------------------------------------------------------------------------------------------------------------------------------------------------------------------------------------------------------------------------------------------------------------------------------------------------------------------------------------------------------------|-------------|-------------------------------------------------------------------------------------------------------------------------------------------------------------------------------------------------------------------------------------------------------------------------------------------------------------|
|                                          | aagcattttgtattaaagaattgaattctgatctc                                                                                                                                                                                                                                                                                                                                                                                                                                                                                                                                                                                                                                                                                                                                                                                                                                                                                                                                                                                                                                                                                                                                                                                                                                                                                                                                                                                                                                                                                                                                                                                                                                                                                      |             |                                                                                                                                                                                                                                                                                                             |
| Dele mVEGFA 3'UTR plasmid                | As shown above with deleted sequences described in the <b>Fig. 8A</b> and Online methods                                                                                                                                                                                                                                                                                                                                                                                                                                                                                                                                                                                                                                                                                                                                                                                                                                                                                                                                                                                                                                                                                                                                                                                                                                                                                                                                                                                                                                                                                                                                                                                                                                 | Lab Made    |                                                                                                                                                                                                                                                                                                             |
| MmiT088635-MT01 (mVEGFR2 3'UTR plasmid)  | >MmiT088635 3'UTR<br>atggaagtgtctctgccggctccgcccccaactctggaatcacga<br>gagagtgctgcttagatttcaagtgttcttccaccaccggaag<br>tagccacattgatttcttttggaggaggacctcagactgcaagg<br>agctgtctcaggcatttccagagaagatgccatgaccaagaat<br>gtgtgactctactcttttccattcatttaaaagctatataatgtgcc<br>ctgctgtggtctcactaccagttaagcaaaagacttcaaacagtggc<br>tctgtctccaagaagtggcaacggcacctctgtgaaactggatcgaat<br>gggcaatgctttgtgtgttgaggatgggtgagatgtcccagggcaggt<br>ctgtctacctggaggctttgtggaggatgcgggctatgagccaagtgt<br>taagtgtgggatgtggactgggaggaaggaaggcgcaagctcgtctg<br>gagagcggttggagcctgcagatgcattgtgctggctctggtggaggt<br>gggcttgtggcctgtcaggaacgcaaaggcggccggcagggtttggt<br>tttgaaggtttgctgtcttcaagctcgggttacaggcgagttccctg<br>tggcgttccactcctaagagagttcctccggactctacgtgtctcc<br>tggcctggccccaggaaggaatgatgcagcttctccttctcatctct<br>caggctgtgccttaattcagaacacaaaagagaggaacgtcggcag<br>aggctcctgacggggccgaagaattgtgagaacagaacagaaactca<br>gggttctgctgggtggagaccacgtggctgccctgggtggcaggtct<br>gagggttctctgtcaagtggcggtaaaggctcaggctgggttcttctc<br>tatctccactctgtcaggcccccaagctcagattttagctttgtggc<br>ttctgatggcagaaaaatcttaattggttggttgctctccagataatc<br>actagccagatttcgaaattacttttagccgaggttatgataacatcta<br>ctgtatcctttagaatttaacctataaaaactatgtctactggttctgcct<br>gtgtgcttatgttaaaaaaaaaaagaaagaaactgttctttcat<br>ttggtaccatagtgtaagagctgggagcaatgactgttaaacatgcta<br>tggcacatctattatagctgttatgtagaacaatgtaatatattaaa<br>acgttatattatataatgaacttgtactaccacctttgtatcagta<br>ttatgtaccactagagagattacaaggcttccagcagccgctgttgttt<br>gttaagactttgagaaactgaaggaatccttcatggaatatgcagc<br>tatataccctaccgtctctctcaaacggaggaggaggaggagg<br>agtcaggatataatgtgagtggttctacgtccttctctgttcttag<br>gaggaatgatttcaaatgtttatgctttataaaccaataaacgta<br>ttctgagtaaagaga | GeneCopoeia | <a href="https://www.genecopoeia.com/product/search/detail.php?prt=16&amp;cid=&amp;key=MmiT088635&amp;type=mirna%20target&amp;choose=MmiT088635">https://www.genecopoeia.com/product/search/detail.php?prt=16&amp;cid=&amp;key=MmiT088635&amp;type=mirna%20target&amp;choose=MmiT088635</a>                 |
| Dele mVEGFR2 3'UTR plasmid               | As shown above with deleted sequences described in the <b>Fig. 8D</b> and Online methods                                                                                                                                                                                                                                                                                                                                                                                                                                                                                                                                                                                                                                                                                                                                                                                                                                                                                                                                                                                                                                                                                                                                                                                                                                                                                                                                                                                                                                                                                                                                                                                                                                 | Lab Made    |                                                                                                                                                                                                                                                                                                             |
| MmiT027087-MT01-01 (mFGF2 3'UTR plasmid) | > MmiT027087-MT01-01 3'UTR<br>ctcacttttgacactgtcactgagacactgtcactgaaaagaagagaat<br>gtatacagcctttatgtaatagtaagacacttaaccattacctcagtag<br>agaaaaacaacaattttggaaaatatttagactccccatttatatag<br>ctttggtgtgaccagtgaggattagactacaatctcatatattcctt<br>tattgaaaagaggatttaaaaatgtacattatgaattccacatg<br>gacataacatagtgagaaaactggcgtcaggttgaatctggtattca<br>gtctgctccattgaggcttgaactctctggcagctccctgtgataga<br>gtttgtagaacaggcctgtgtacactgcagggagctcctcatgctgag<br>gtcaattttgtcaaaccttccctgagtcatacagcagtagcctagcc<br>accctgctggtgatggggctgtgttttagtccggccagggtttctag<br>atcaatccattcacactcaagcattcctgctggcagaagttgatagtg                                                                                                                                                                                                                                                                                                                                                                                                                                                                                                                                                                                                                                                                                                                                                                                                                                                                                                                                                                                                                                                                                                           | GeneCopoeia | <a href="https://www.genecopoeia.com/product/search/detail.php?prt=16&amp;cid=&amp;key=MmiT027087&amp;type=mirna%20target&amp;choose=MmiT027087-MT01-01">https://www.genecopoeia.com/product/search/detail.php?prt=16&amp;cid=&amp;key=MmiT027087&amp;type=mirna%20target&amp;choose=MmiT027087-MT01-01</a> |

|  |                                                                                                                                                                                                                                                                                                                                                                                                                                                                                                                                                                                                                                                                                                                                                                                                                                                                                                                                                                                                                                                                                                                                                                                                                                                                                                                                                                                                                                                                                                                                                                                                                                                                                                                                                                                                                                                                                                                                                                                                                                                                                                                                                                                                                                                                                                                                                                                                                                                                                                                                                                                                                                                                                                                                                                                                                                                                                 |  |  |
|--|---------------------------------------------------------------------------------------------------------------------------------------------------------------------------------------------------------------------------------------------------------------------------------------------------------------------------------------------------------------------------------------------------------------------------------------------------------------------------------------------------------------------------------------------------------------------------------------------------------------------------------------------------------------------------------------------------------------------------------------------------------------------------------------------------------------------------------------------------------------------------------------------------------------------------------------------------------------------------------------------------------------------------------------------------------------------------------------------------------------------------------------------------------------------------------------------------------------------------------------------------------------------------------------------------------------------------------------------------------------------------------------------------------------------------------------------------------------------------------------------------------------------------------------------------------------------------------------------------------------------------------------------------------------------------------------------------------------------------------------------------------------------------------------------------------------------------------------------------------------------------------------------------------------------------------------------------------------------------------------------------------------------------------------------------------------------------------------------------------------------------------------------------------------------------------------------------------------------------------------------------------------------------------------------------------------------------------------------------------------------------------------------------------------------------------------------------------------------------------------------------------------------------------------------------------------------------------------------------------------------------------------------------------------------------------------------------------------------------------------------------------------------------------------------------------------------------------------------------------------------------------|--|--|
|  | <p>aaggaacgaggctgcaggcggcagaccaggtacatgtctgacatccc<br/>gaaggccccagggtcctgtgttgctgccgatgctcaacaggacct<br/>gaattctgacttgacaccagtctctcaaaaacctctggactgctgtg<br/>ctgctatgtgagagagagagacaaacataaagatttccttaga<br/>gacgccatcaaagatttcagttaaaatctggaagattaaaagcaaaa<br/>tttgtctcaaaactgctttctggacggttgaaatgtactttgcatctaa<br/>gacactgagagctttctggaggcttatgacatttatattggaagtcac<br/>atcttatctctctgtgttacccaaatgcaagaacacgttgcaaac<br/>aaagctgaagttaatatgttgataaatcttcactattgtccatttga<br/>gctttcatcaaactgccggagtttggtgatgtctgaattgaaaagacc<br/>atccctgttacagaagtctgtagtctgaacatacttgagtgagctgtg<br/>aatgactctgacttcttgtaatctcaagccactgccctcccctcact<br/>cagggcaaggcccttgctcctgccctggccaccaatggaccaagctt<br/>gatatagaaactgcatttcttgaaatcagattgtatagaactgggact<br/>cactaacacaaaatggaatagctgtctcatcagatatcttgtaaggc<br/>tggaacacataacaatataatacaccaagggtttcatatgttata<br/>aatatttccattaaatacaagttccatggcaggactttatgtccatca<br/>acatacattatgtccagttttctagacacatacgaagtctgcacaaat<br/>agactcccagttctgatgctctatagctgtctgccttagatgctttct<br/>ggtagcttcaaaaattgctgttggtgtttaaaccttctaatgcctct<br/>ggatgtttgttagacagcatatacacgtgtcttccagtagtcctaaag<br/>ataacatccatgcaatgaagagctattagaagtacatagttcctgtgca<br/>ctcaaacacactgtcttctgccactggacacataccagccccaa<br/>aacatgctctgttctcaagaagagttctggaaggatcacaggaag<br/>agtaattggctaaaacataagacatctagctgccattcttaactata<br/>tgctgactttctgtgaatgagatctgttcataggttaggcatggccag<br/>aaattacattctaaaactgcaagcaccagaccaggcacatagctcag<br/>catgtatactgcctgtctcatatgtgtgggtgcttagtacagttcccag<br/>gaccaaccacacaatgggggaggggaatggaggcatcaaagaacagt<br/>ctaggctcaaaaagttctctagtaagaaaatagttcttatctagcatat<br/>aatacattataaattattactaaaaatgtggcactactctaaatgtt<br/>tatatagtgcttcaactctgtttaatatatacttattctttaaagg<br/>ttctagaaaataaactggggatcctgctcagttcctagcaccactaat<br/>ctgactcgtgtaggtaaaattacagaataggacagagtagatgaaaga<br/>acgggtgtcgtgcttagcagtcattgtggcactatgggggtgacaggac<br/>aaactatctgtgaagttcgtatagtttaacgtgaatcagcacatccc<br/>caaactagctgaaaccggataatgcaagccaataattctgcatctgag<br/>atgtggatattctcccctccacctcaaaaatggaagtctcccttggtt<br/>caacatgcatttaagttcatcaagataaactgttattcttttagaattatc<br/>ttagtagactttaaactcagctgaaataataactgcatatgaagaa<br/>tctagaagctcagtttgctgatgaagagatgttgatgttagatgttc<br/>tgaggtttctgttctgttagggagaggcagcttgagatggaagaga<br/>gtgatgggaagcctccagcatgtgacttcttgagctcccttagtctc<br/>ggtagcatttctggctggctgaaacaggacacggtttccacctggg<br/>aatgacatatttaggaaggcctttgttccttgaaatcgtagacact<br/>ttaaactcaagccttgaggacttcaatatgtttgcatttccaactta<br/>gtttctttaaactttgcatatcaatgtttcatctatctagcattatca<br/>gagaatgaaagattccaaacaaatgagttccaaattaactagtattta<br/>ttaccagaatttgcaaccgtctagttacagccaataaatgtgaaact<br/>gttcatgatggcaacattccaaaattttatctatgcttctaaacaaag<br/>gttcaagaatataattccatagctctagacaatcagagagttttatt<br/>ttgactatgctgtcaaattgtgctatagaagcaggctggagaagggca<br/>agtctaggagaatggtgaatgtcagcttctgtttttagttcagat</p> |  |  |
|--|---------------------------------------------------------------------------------------------------------------------------------------------------------------------------------------------------------------------------------------------------------------------------------------------------------------------------------------------------------------------------------------------------------------------------------------------------------------------------------------------------------------------------------------------------------------------------------------------------------------------------------------------------------------------------------------------------------------------------------------------------------------------------------------------------------------------------------------------------------------------------------------------------------------------------------------------------------------------------------------------------------------------------------------------------------------------------------------------------------------------------------------------------------------------------------------------------------------------------------------------------------------------------------------------------------------------------------------------------------------------------------------------------------------------------------------------------------------------------------------------------------------------------------------------------------------------------------------------------------------------------------------------------------------------------------------------------------------------------------------------------------------------------------------------------------------------------------------------------------------------------------------------------------------------------------------------------------------------------------------------------------------------------------------------------------------------------------------------------------------------------------------------------------------------------------------------------------------------------------------------------------------------------------------------------------------------------------------------------------------------------------------------------------------------------------------------------------------------------------------------------------------------------------------------------------------------------------------------------------------------------------------------------------------------------------------------------------------------------------------------------------------------------------------------------------------------------------------------------------------------------------|--|--|

|                                        |                                                                                                                                                                                                                                                                                                                                                                                                                                                                                                                                                                                                                                                                                                                                                                                                                                                                                                                                                                                                                                                                                                                                                                                                                                                                                                                                                                                                                                                                                                                                                                                                                                                                                                                                                                                                                                                                                                                                                                                                                                                                                                                                                                                                                                                                                                                                                          |             |                                                                                                                                                                                                                                                                                                       |
|----------------------------------------|----------------------------------------------------------------------------------------------------------------------------------------------------------------------------------------------------------------------------------------------------------------------------------------------------------------------------------------------------------------------------------------------------------------------------------------------------------------------------------------------------------------------------------------------------------------------------------------------------------------------------------------------------------------------------------------------------------------------------------------------------------------------------------------------------------------------------------------------------------------------------------------------------------------------------------------------------------------------------------------------------------------------------------------------------------------------------------------------------------------------------------------------------------------------------------------------------------------------------------------------------------------------------------------------------------------------------------------------------------------------------------------------------------------------------------------------------------------------------------------------------------------------------------------------------------------------------------------------------------------------------------------------------------------------------------------------------------------------------------------------------------------------------------------------------------------------------------------------------------------------------------------------------------------------------------------------------------------------------------------------------------------------------------------------------------------------------------------------------------------------------------------------------------------------------------------------------------------------------------------------------------------------------------------------------------------------------------------------------------|-------------|-------------------------------------------------------------------------------------------------------------------------------------------------------------------------------------------------------------------------------------------------------------------------------------------------------|
|                                        | <p>gggtgagctatTTTgataaccacgggtactTTaagaaaactagtagtac<br/> atTaaaatatctaggctTaaaggaatgattctggaattaaattTaaac<br/> ctgaattatacgtatTTaactTgaaaatagctcccctcatttatct<br/> aagtctgcTgaaattcttaggatctactaaagctcaaagaggaata<br/> aacctcacctTaatcattTgacaaggtatgcagggctgcagctggct<br/> TccccagTgtggagggggaagactagactTgagttacctcattcac<br/> atgctctcaataccacataggtaatggcagTattgaaagacggagaaa<br/> atgaagaaggcggctTaatgggaaaaaatggccctTgctctcagTat<br/> ctggTgctcctacaaaatacagatgTgtTgacatagcatggTctgag<br/> tagcacagggcctTgatacacctTctTgcctcagcctcctTgctgt<br/> gaggagcagcatgTgcatcacaccaggtcctcagagtacacactg<br/> TaccagactaccacagagaactaaggaaacaggtcagTgagaac<br/> ctcacaccagggTttTctTgtTgtgaatgTcatgaatgTtTgctcatg<br/> ggctgctaggatctggactTgTaaatacatacagggcattTtTgatctgT<br/> caacactTaaaatcagatctcatgaacataTtTcaacaaaagTaa<br/> acacaggagactgctTaatacagTggctggTtaagaagaacaaga<br/> atgTgcatattaagaaaggcctTtgagaacaatTtggTatctaatg<br/> TattacgtaccaataaggatgacgtTgaattTaaagctaatggTtaagg<br/> gtcagcatgattctatactTgcatcagTgactaagTgcagagTtcat<br/> cctagctccTcagggctgactTggaggaggggggcatgTtattTgcc<br/> actcaagactTtTcacagTaaactTattatgTttTatgTtattTcaaaata<br/> gctggcaaaattTccaaggagattTatcatcactattTcctTatagTtag<br/> TttactgTactTcaagattTatctagaatTattaatTcaaaaattTtt<br/> atTcaaaaattTaccagTctgTgataaaatggTcaagactTcaaaa<br/> ctTaaatTtagccatattTgaaaaaactTtataattactaatactg<br/> atgaacaactcaagcctTtTcctTccagatgacctcagagaaccattgg<br/> aaaggggctccgcatagctatcaactgtacaggcgaatgactgtgT<br/> tagaaagtTctgTactTgtatccctccgaagaatctgTctgaatt<br/> TtctaacttagTgTgaaccaattggaaactccaattctTattctcagct<br/> acagagcagggaaagTaaagctatgactTttgTaaacattTcaagTtT<br/> TcagacatgTcaaaatacataccaatattTctcctggctccgacaggc<br/> ctcctgTaaactTccatgTttTcaactgcatgTcaagTaaaaaaa<br/> aaaaaggtTcatgTctgactTcctTctcctcccctTctcccactcc<br/> cacctcggccactcagTtggTcaaggacggaagaactagTtTgcattat<br/> gtTatccccattTcccacccagctTtTctactgctcattgTtctTttt<br/> gaggagatggTgatggatgaagTctTtTcctTactTctcaggaaat<br/> agaagTggTgtattTtagTtaatgTgatacagctTgtTtaacgaactT<br/> cggagggaatatctatttagTtTgtactTcacggaactcagctgTca<br/> gtTaaactatgaactgataggtTttTcggatgTgctatgagTaaagT<br/> agTacaagaataatgTaaaccaaggtatgTaccctagatTttTac<br/> atgctTtactgTattTgtTtTctaatcacaggtattactcaagattTctgT<br/> gtgTtactgTttTatgcaaaatgTaatgctTttTatgggtagTgTgaat<br/> aaagTattctgTttTctggcta</p> |             |                                                                                                                                                                                                                                                                                                       |
| Dele mFGF2 3'UTR plasmid               | As shown above with deleted sequences described in the <b>Fig. 8G</b> and Online methods                                                                                                                                                                                                                                                                                                                                                                                                                                                                                                                                                                                                                                                                                                                                                                                                                                                                                                                                                                                                                                                                                                                                                                                                                                                                                                                                                                                                                                                                                                                                                                                                                                                                                                                                                                                                                                                                                                                                                                                                                                                                                                                                                                                                                                                                 | Lab Made    |                                                                                                                                                                                                                                                                                                       |
| MmiT088636-MT01 (mFGFR1 3'UTR plasmid) | <p>&gt; MmiT088636-MT01 3'UTR<br/> ctaccaacctgTccccagTttTctccattccgTcgtcaccctgTccct<br/> caccacaatcccTtTgtTggacactgTcctTtTcctcctcctTtTgCg<br/> ctggcaagagccagTcctgactgaggcctTctgTgtTgTgCctTccc<br/> cctccatcaccccaagaccctTctTcctcctTctTtagcctgTgTg<br/> agagaggagccaagaggcaggtgTgCcgacggcGcatcctcctTc<br/> ccaggtgTtggaccaagaccgcccGctgCctggcactgctTggaggt<br/> gtGcagagcGgaagcaagTggagcatccggggcattcctgTgacca</p>                                                                                                                                                                                                                                                                                                                                                                                                                                                                                                                                                                                                                                                                                                                                                                                                                                                                                                                                                                                                                                                                                                                                                                                                                                                                                                                                                                                                                                                                                                                                                                                                                                                                                                                                                                                                                                                                                                                                       | GeneCopoeia | <a href="https://www.genecopoeia.com/product/search/detail.php?prt=16&amp;cid=&amp;key=MmiT088636&amp;type=mirna%20target&amp;choose=MmiT088636-MT01">https://www.genecopoeia.com/product/search/detail.php?prt=16&amp;cid=&amp;key=MmiT088636&amp;type=mirna%20target&amp;choose=MmiT088636-MT01</a> |

|                              |                                                                                                                                                                                                                                                                                                                                                                                                                                                                                                                                                                                                                                                                                                                                                                                                                                                                                                                                                                                                                                                                                                                                                                                                                                                                                                                                                                                                                                                                                                                                                                                                                           |          |  |
|------------------------------|---------------------------------------------------------------------------------------------------------------------------------------------------------------------------------------------------------------------------------------------------------------------------------------------------------------------------------------------------------------------------------------------------------------------------------------------------------------------------------------------------------------------------------------------------------------------------------------------------------------------------------------------------------------------------------------------------------------------------------------------------------------------------------------------------------------------------------------------------------------------------------------------------------------------------------------------------------------------------------------------------------------------------------------------------------------------------------------------------------------------------------------------------------------------------------------------------------------------------------------------------------------------------------------------------------------------------------------------------------------------------------------------------------------------------------------------------------------------------------------------------------------------------------------------------------------------------------------------------------------------------|----------|--|
|                              | <p>tcagccccttctgttctggcggcaggggccttggggctcctggaagccg<br/> tgaggttctgttttaggccttaaccgaaggcaacctctgctccagatgg<br/> atggtaccagtagcttctaattccaactaatttgcttctgctgaccaa<br/> atacctgcctggtagcagaagacagggaggcagagactgggagccgt<br/> gatgtgcccttgggctgagccctagactggggctctgtacatagctat<br/> gaagaaaaacacaaagtgtataaatcttgagtatatattacatgtctt<br/> ttaaaaagggtcgttactagagatttaccatgggggagacgccag<br/> ggtagcatccgttctatatataaaaaacaaacgaacagaaagaaaa<br/> aaaaaaggaaaatgtttttaaaggatcatatatttttctacttttgc<br/> tgttttatttttaaatatgttttaaacctatttccagtttaggttccctc<br/> aataaaaaattgctgctgcttctttatcctgggcgtgtaaaagag<br/> agcaggtgtccagcgcagaggaggagacagggggtaaggccat<br/> gagctggtcttccccctgccccctgacctctgtctcctggattgtccc<br/> cagacctccagccaagccttctatctccgatgcattgggaacagcag<br/> gagaagactgaggtcctgagggcagagagccaagctcgcacactga<br/> ttgttctcggaggagagagtgagaggatgaggttagccagagggtg<br/> gaactggacagaaacccaaccctagaccctgtacattcagatgtctt<br/> gtctatcttcccaacctactcctcatattcctctcctgtaaatatcctcc<br/> cttccctgttggctctgttaccagttgggtctgtccctgagcttgcttc<br/> ctatagttttccttcacaaactccaccatccctcaggaaacagaaaa<br/> cgatctcttggttgggtcaactggcaactcaattctgccacctgctg<br/> gttgccttggtagcttggctcttattcaaacccacacctcaagcctta<br/> gagggttgttttgttttgtttgtttgtttgtttgtttgtttgtttt<br/> ttctgggtctgctgaatacaaacctgttcagtatgattcatctgtaggg<br/> gttagggctgcttcttaaatgcagtttggcagctgtggttgggtcatt<br/> gtcataagagtcttatcgttgttctctctgtacacatgtaactgtcaaa<br/> atattatgaatggttttatgctgaaagaagacatcattggcaaagag<br/> ggctagggaaatgaatttagcacaactcatttcttggagaccgtgtat<br/> catagtggttttttttttcttctctgtttaaactgaacattatttctg<br/> cctca</p> |          |  |
| Dele mFGFR1<br>3'UTR plasmid | As shown above with deleted sequences described<br>in the <b>Fig. 8J</b> and Online methods                                                                                                                                                                                                                                                                                                                                                                                                                                                                                                                                                                                                                                                                                                                                                                                                                                                                                                                                                                                                                                                                                                                                                                                                                                                                                                                                                                                                                                                                                                                               | Lab Made |  |

### Cultured Cells

| Name                                                                       | Vendor or Source                                                    | Sex (F, M,<br>or<br>unknown) | Persistent ID / URL                                                                                                                                                                                                                   |
|----------------------------------------------------------------------------|---------------------------------------------------------------------|------------------------------|---------------------------------------------------------------------------------------------------------------------------------------------------------------------------------------------------------------------------------------|
| C57BL/6 mouse primary<br>brain microvascular<br>endothelial cells (mBMECs) | Cell Biologics, Inc.<br>(C57-6023; Chicago,<br>IL, USA)             | unknown                      | <a href="https://www.cellbiologics.net/index.php?route=product/product&amp;path=2_47_89_91&amp;product_id=2240">https://www.cellbiologics.net/index.php?route=product/product&amp;path=2_47_89_91&amp;product_id=2240</a>             |
| Primary human brain<br>microvascular endothelial<br>cells (hBMECs)         | Cell Systems (ACBRI<br>376; Kirkland, WA,<br>USA)                   | unknown                      | <a href="https://cell-systems.com/products/human-brain-microvascular-endothelial-cells-acbri-376?variant=37945739019">https://cell-systems.com/products/human-brain-microvascular-endothelial-cells-acbri-376?variant=37945739019</a> |
| Mouse brain microvascular<br>endothelial cell line bEnd3<br>cells          | American Type<br>Culture Collection<br>(CRL-2299; ATCC,<br>VA, USA) | unknown                      | <a href="https://www.atcc.org/products/all/CRL-2299.aspx#generalinformation">https://www.atcc.org/products/all/CRL-2299.aspx#generalinformation</a>                                                                                   |
| 293TN producer cells                                                       | System Biosciences<br>(LV900A-1; SBI, CA,<br>USA)                   | unknown                      | <a href="https://systembio.com/shop/293tn-producer-cell-line/">https://systembio.com/shop/293tn-producer-cell-line/</a>                                                                                                               |

### Other

DOI [to be added]

| <b>Description</b>                                                    | <b>Source / Repository</b>          | <b>Persistent ID / URL</b> |
|-----------------------------------------------------------------------|-------------------------------------|----------------------------|
| Dounce Tissue Grinder Tube                                            | Kimble Chase                        | Cat # 885303-0015          |
| Biotinylated tomato lectin                                            | Vector laboratories                 | Cat # B-1175               |
| Alexa Fluor® 488 streptavidin                                         | Jackson ImmunoResearch Laboratories | Cat # 016-540-084          |
| 5-Bromo-2'-deoxyuridine                                               | Sigma Aldrich                       | Cat # B5002-5G             |
| human VEGFA siRNA Silencer™ Select (siRNA ID s228861)                 | ThermoFisher Scientific             | Cat # 4392420              |
| human FGF2 siRNA Silencer™ Select (siRNA ID s5129)                    | ThermoFisher Scientific             | Cat # 4392420              |
| Silencer™ Select Negative Control No. 2 siRNA                         | ThermoFisher Scientific             | Cat # 4390846              |
| Corning Matrigel Membrane Matrix                                      | Fisher Scientific                   | CB-40234                   |
| BrdU Cell Proliferation Kit                                           | Millipore-Sigma                     | Cat # 2750                 |
| TaqMan® MicroRNA Reverse Transcription Kit                            | Applied Biosystems                  | Cat # 4366596              |
| has-miR-15a (Assay ID 000389), TaqMan MicroRNA Assays                 | Applied Biosystems                  | Cat # 4427975              |
| hsa-miR-16 (Assay ID 000391), TaqMan MicroRNA Assay                   | Applied Biosystems                  | Cat # 4427975              |
| snoRNA202 (Assay ID 001232), TaqMan MicroRNA Assays                   | Applied Biosystems                  | Cat # 4427975              |
| has-miR-497 (Assay ID 001043), TaqMan MicroRNA Assays                 | Applied Biosystems                  | Cat # 4427975              |
| U6 snRNA (Assay ID 001973), TaqMan MicroRNA Assays                    | Applied Biosystems                  | Cat # 4427975              |
| RNU48 (Assay ID 001043), TaqMan MicroRNA Control Assay                | Applied Biosystems                  | Cat # 4427975              |
| miRNeasy Mini Kit (50)                                                | Qiagen                              | Cat # 217004               |
| Oligo (dT) Primer (50 µM)                                             | ThermoFisher Scientific             | Cat # AM5730G              |
| Bovine Serum Albumin Fraction V                                       | Sigma Aldrich                       | Cat # 10735086001          |
| Invitrogen™ Total Exosome Isolation Reagent (from cell culture media) | Fisher Scientific                   | Cat # 44-738-59            |
| Invitrogen™ Total Exosome RNA & Protein Isolation Kit                 | Fisher Scientific                   | Cat # 44-785-45            |
| pPACKH1-XL HIV Lentivector Packaging Kit                              | System Biosciences                  | Cat # LV510A-1             |
| PureFection Transfection Reagent                                      | System Biosciences                  | Cat # LV750A-1             |
| PEG-it Virus Precipitation Solution                                   | System Biosciences                  | Cat # LV810A-1             |
