# Supplementary material
Source: PubMed Central journal article supplement (PMC7172020)

# Full unedited gel for Figure 7E

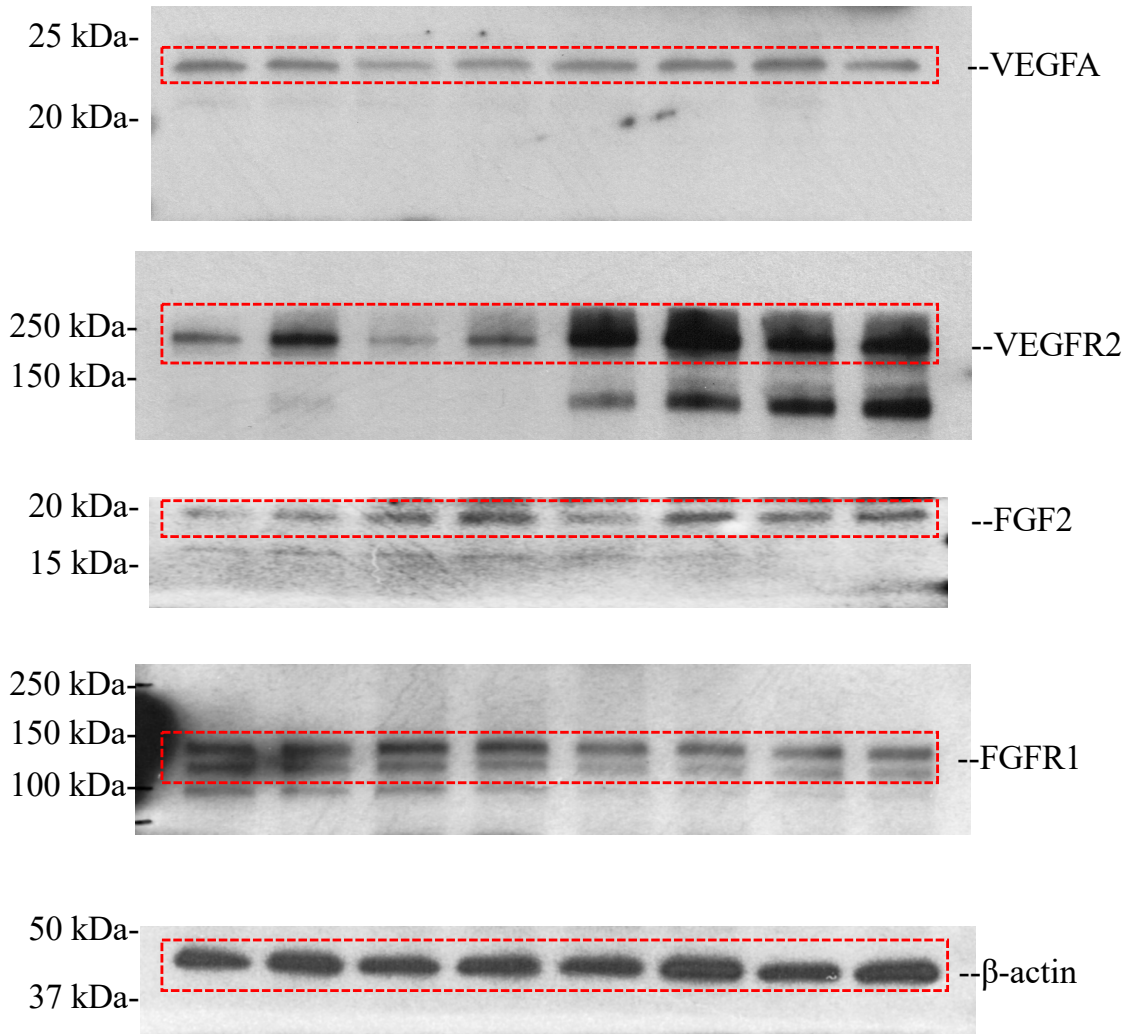

# Full unedited gel for Figure 7N

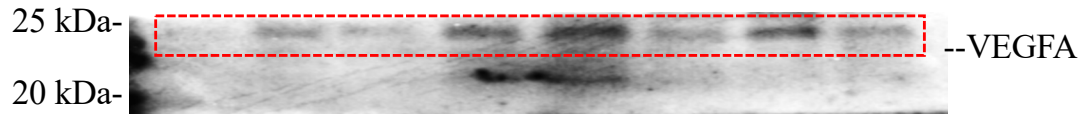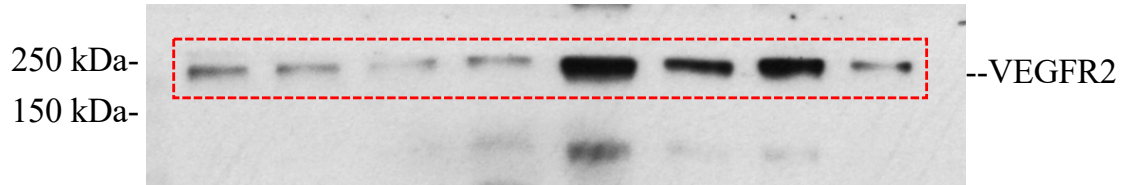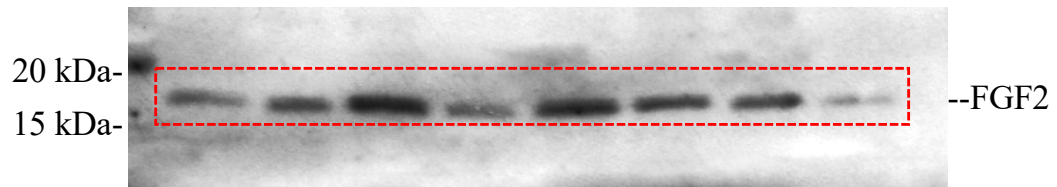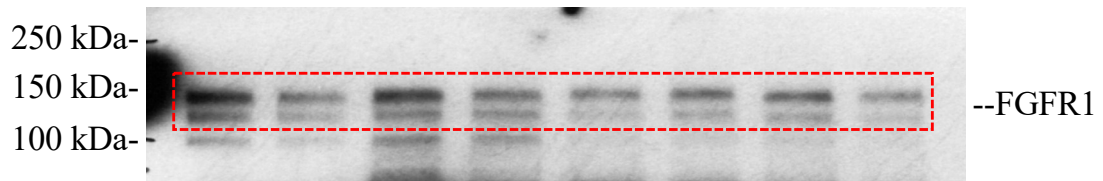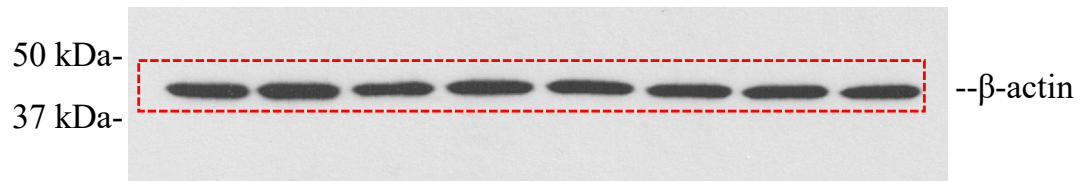

# Full unedited gel for Online Figure XVI4

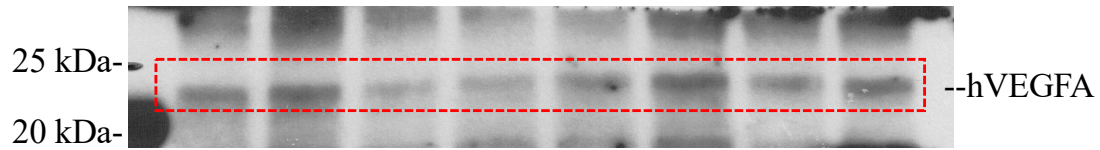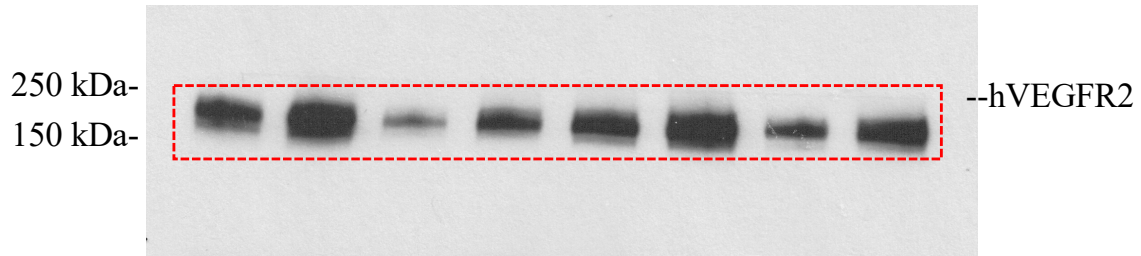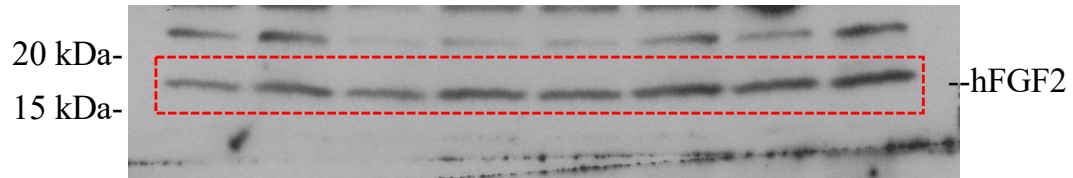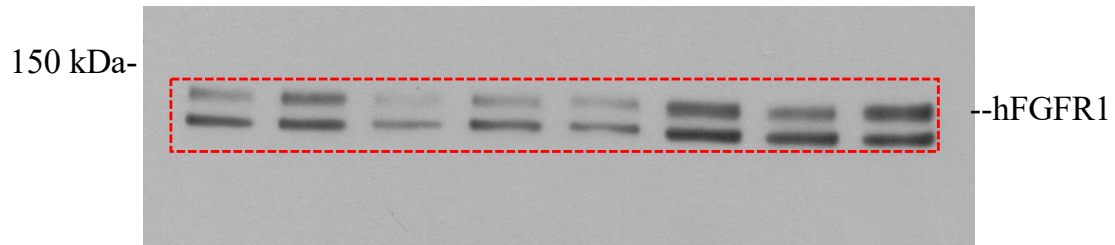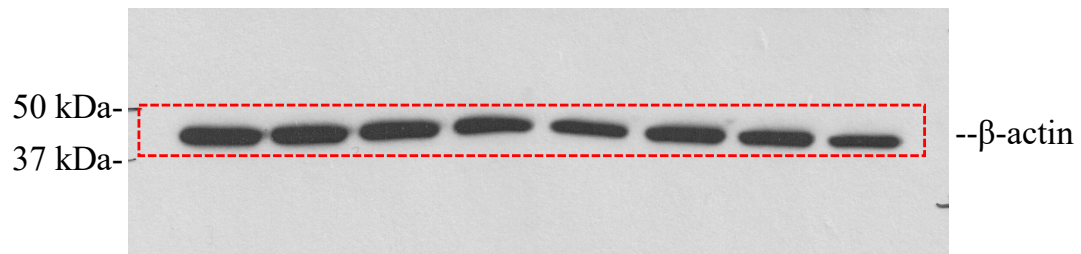

Supplement: NIHMS1572102-supplement-315886_Uncut_Gel_Blots.pdf [file NIHMS1572102-supplement-315886_Uncut_Gel_Blots.pdf]
